# Supplementary material for: Odd skipped-related 1 identifies a population of embryonic fibro-adipogenic progenitors regulating myogenesis during limb development
Source: PubMed Central journal article supplement (PMC5662571; doi:10.1038/s41467-017-01120-3), 2017-10-31
Supplement: 41467_2017_1120_MOESM1_ESM.pdf [file 41467_2017_1120_MOESM1_ESM.pdf]

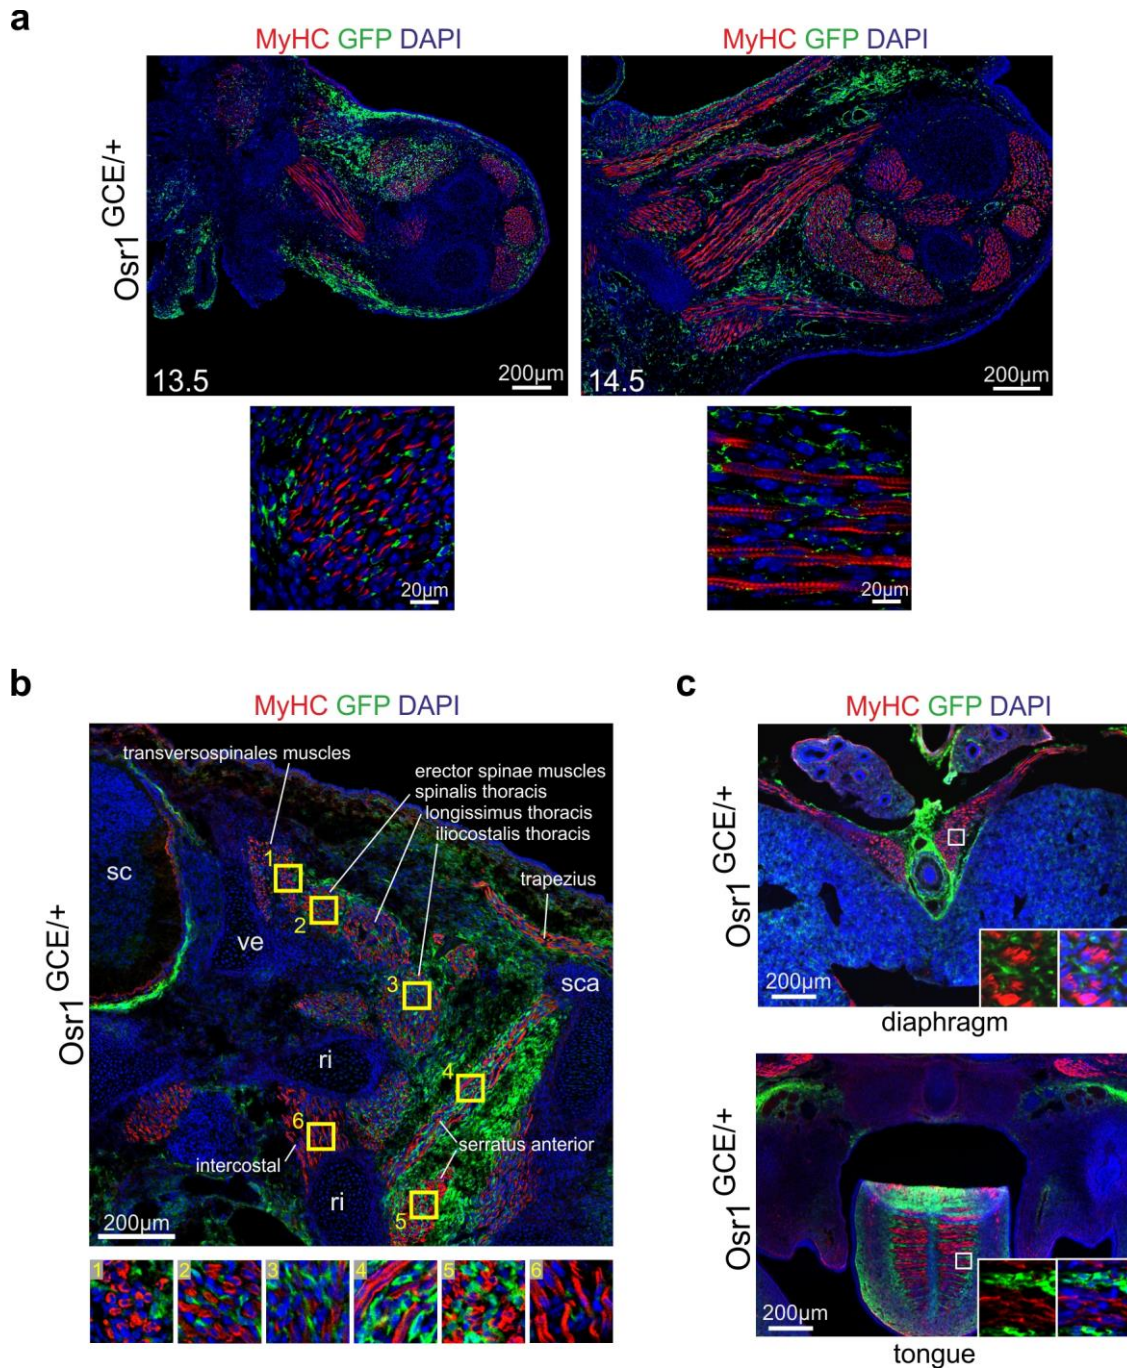

**Supplementary Figure 1. Expression of *Osr1* analysed by immunolabelling for GFP expressed from the *Osr1<sup>GCE</sup>* allele.** (a) Overview of *Osr1* expression pattern in E13.5 and E14.5 mouse hindlimbs. *Osr1* is expressed in irregular connective tissue cells in distinct regions of the limb. *Osr1* expression is associated with muscles, but also in the dermis. *Osr1* is expressed in cells interstitial to myofibers. Note that *Osr1* is expressed associated with some but not all muscles. (b) *Osr1* expressing cells are found in other muscle groups as muscles of the shoulder girdle and superficial and deep back muscles or (c) diaphragm and tongue. Boxed regions in (b) are shown in the numbered panels below and are magnifications of the area. Muscle names are indicated in the overview picture. Ve: vertebral condensation, ri: rib condensation, Sca: scapula, sc: spinal cord. Images are representatives of n=3 experiments.

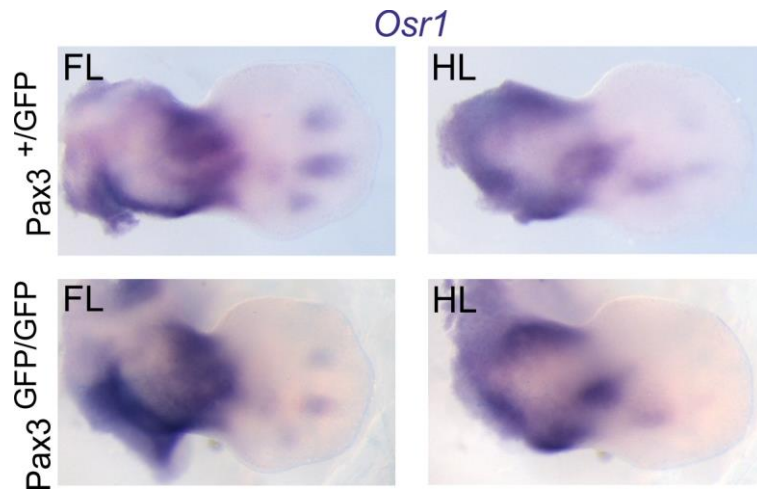

**Supplementary Figure 2. Normal *Osr1* expression in muscleless limbs.** *Osr1* expression assessed by whole mount *in-situ* hybridization on E12.5 limbs from *Pax3* heterozygous (control) or null (muscleless) embryos. Note that the expression pattern of *Osr1* is similar in both situations.

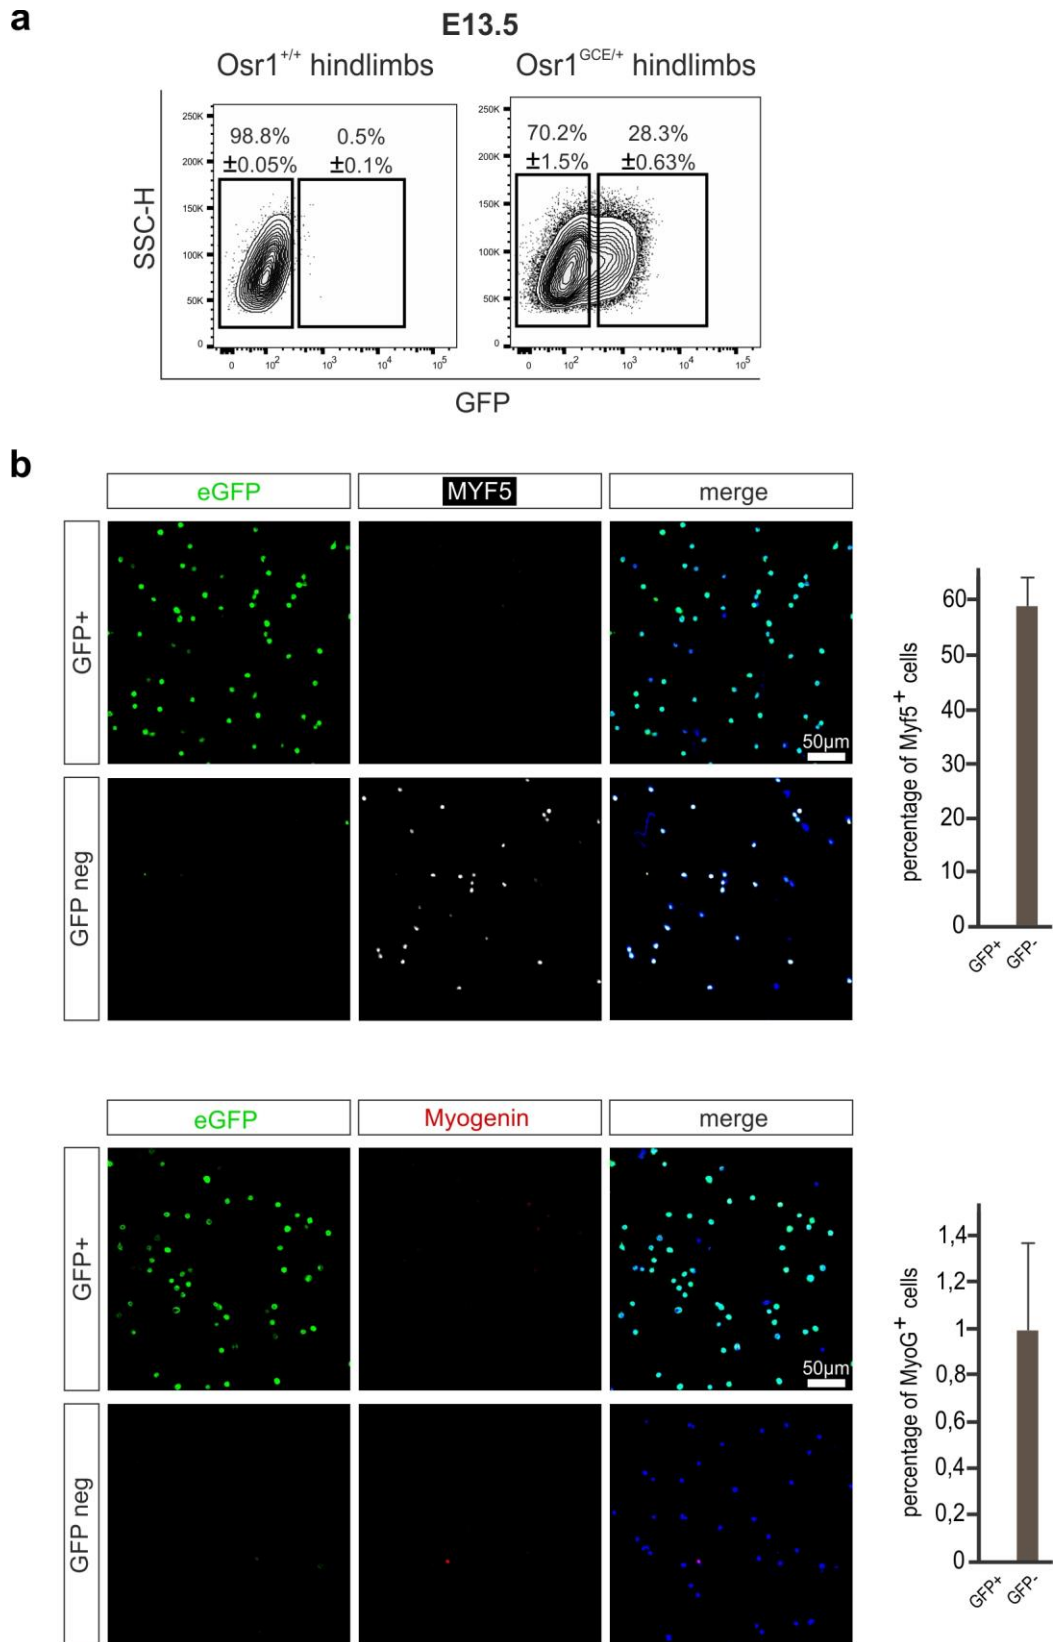

**Supplementary Figure 3. *Osr1* is not expressed in myogenic cells.** (a) GFP<sup>+</sup> and GFP<sup>-</sup> cells were FACS isolated from E13.5 *Osr1*<sup>GCE/+</sup> fore- and hindlimbs. (b) FACS-isolated cells were cytopun and immunolabeled for Myf5 and Myogenin. No GFP expression was observed in myogenic cells, no Myf5<sup>+</sup> or Myogenin<sup>+</sup> cells were detected in the GFP<sup>+</sup> population. Quantification shown right (n=3). Myogenin expression was only sparsely detected in the GFP<sup>-</sup> population (approx. 1% of cells).

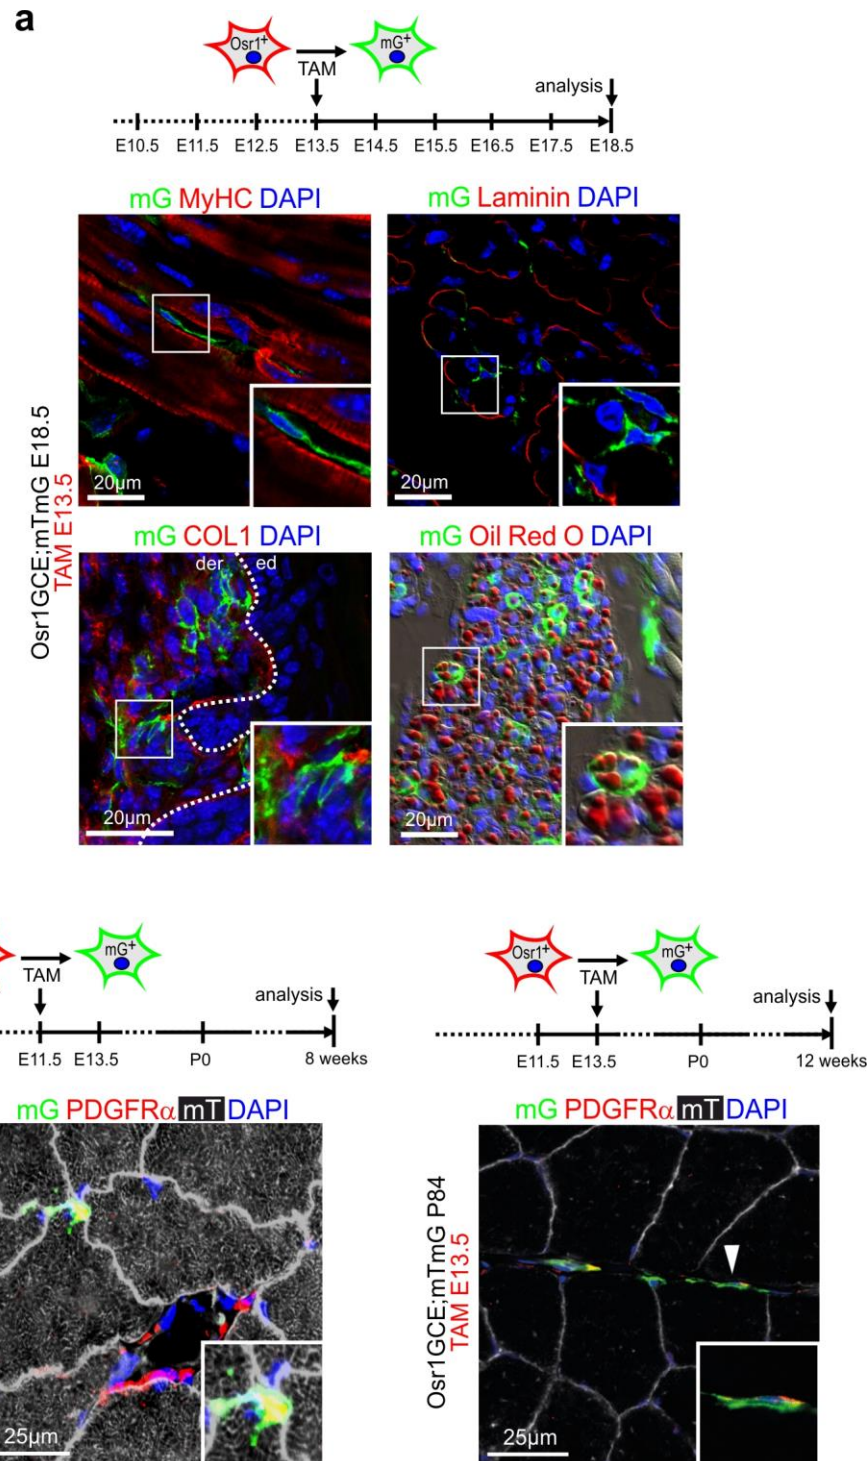

**Supplementary Figure 4. In vivo differentiation potential of *Osr1*<sup>+</sup> cells.** (a) Tamoxifen induction of *Osr1*<sup>GCE/+</sup>;*R26R*<sup>mTmG/+</sup> mice was done at E13.5, analysis was performed at E18.5. *Osr1*<sup>+</sup> cell descendants are found in the muscle interstitium (myofibers are labelled for MyHC or Laminin), in dermal fibroblasts embedded in a Collagen I (COL1) rich matrix and in adipose tissue (oil red O staining). Representative images of n=3 experiments are shown. (b) Tamoxifen induction of *Osr1*<sup>GCE/+</sup>;*R26R*<sup>mTmG/+</sup> mice was done at E11.5 or E13.5, analysis was performed at P56 (8 weeks) or P84 (12 weeks). *Osr1* cell progeny (mG positive) cells are visible in the muscle interstitium, the cells coexpress PDGFR $\alpha$ . Representative images of n=3 experiments are shown.



**a**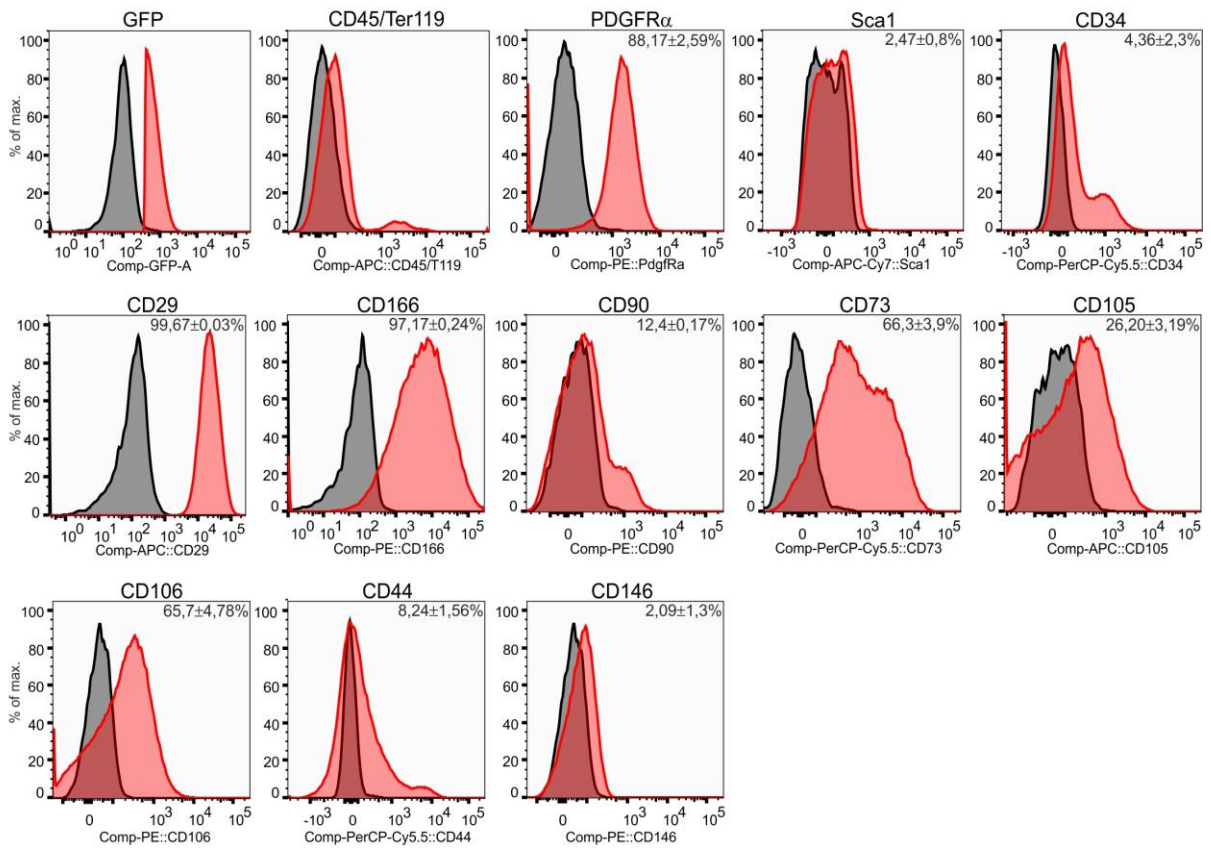**b**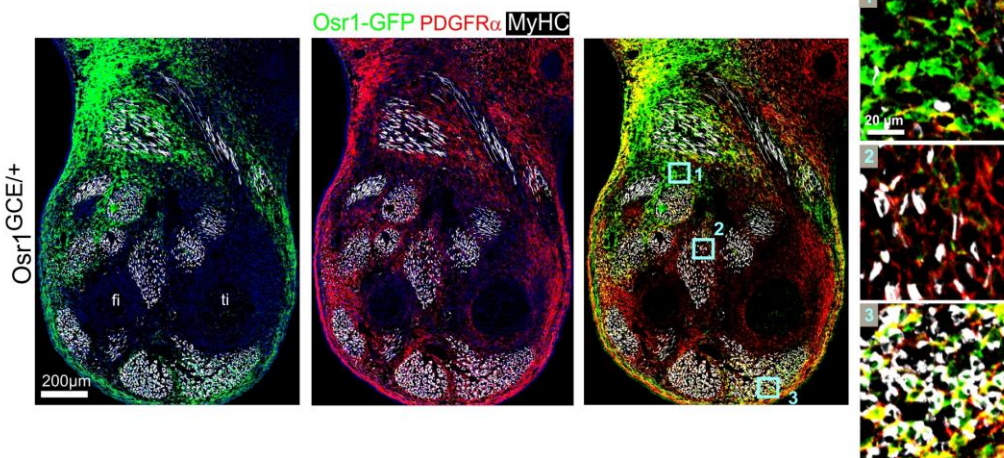

**Supplementary Figure 5. Identity of E13.5 *Osr1*<sup>+</sup> cells.** (a) *Osr1*<sup>+</sup> cells were sorted based on GFP expression; cells were negative for hematopoietic markers CD45 and Ter119. *Osr1*<sup>+</sup> cells are positive for the FAP marker PDGFR $\alpha$ , but negative for adult FAP markers CD34 and Sca1 (Ly6A/E). *Osr1*<sup>+</sup> cells are positive for FAP/MSc overlapping markers CD29 and CD166 and negative for CD90. *Osr1*<sup>+</sup> cells are positive for MSc markers CD73, CD105, CD106 and negative for CD44 and CD146. Percentage values of positive cells are indicated, error represents s.e.m. (n=3). (b) Immunolabeling for *Osr1*-GFP and PDGFR $\alpha$  on sections of E13.5 *Osr1<sup>GCE/+</sup>* hindlimbs. Boxed regions are shown in the numbered panels to the right and are magnifications of the area. The expression patterns of *Osr1*-GFP and PDGFR $\alpha$  are largely overlapping thus confirming the FACS analysis, however regional PDGFR $\alpha$  expression in *Osr1* cells can be seen. Ti: tibia; fi: fibula.

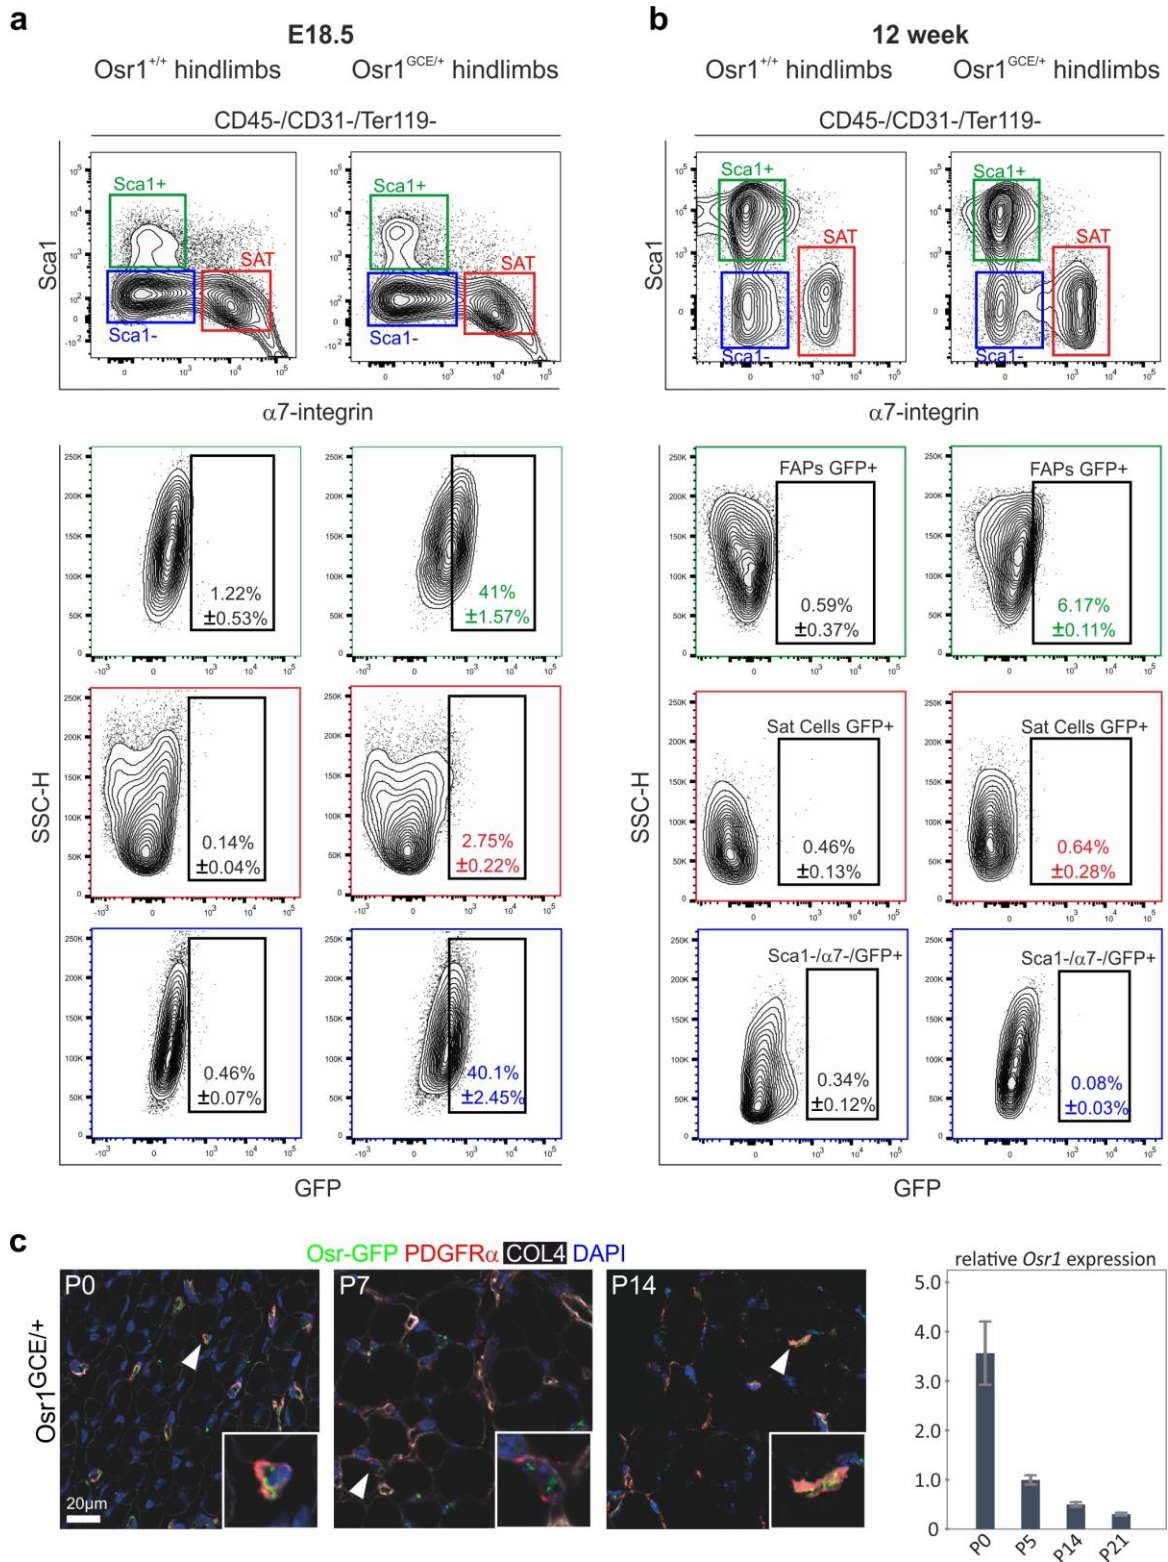

**Supplementary Figure 6. *Osr1* cells gain expression of *Sca1* during development, but *Osr1* is downregulated in FAPs after birth.** (a) comparative FACS analysis of *Sca1*<sup>+</sup> cells from E18.5 and (b) from adult (12 week old) mouse limb muscles. Note that at E18.5 the majority of limb muscle interstitial cells are still *Sca1*<sup>-</sup> (blue square), but a *Sca1*<sup>+</sup> population is emerging (green square). In both populations *Osr1*-GFP<sup>+</sup> cells are found. In adult *Sca1*<sup>+</sup> FAPs, only low GFP expression can be observed, indicating low *Osr1* expression levels. Percentage values are indicated, error represents s.e.m. (n=3). (c) Immunolabeling for GFP on sections of *Osr1*<sup>GCE/+</sup> hindlimbs at the indicated time points after birth. *Osr1* expression apparently decreases in the first weeks after birth, which is confirmed by RT-qPCR for *Osr1* on RNA from whole tibialis anterior muscle lysates of C57Bl6 wild type mice (right). Error bars indicate standard deviation.



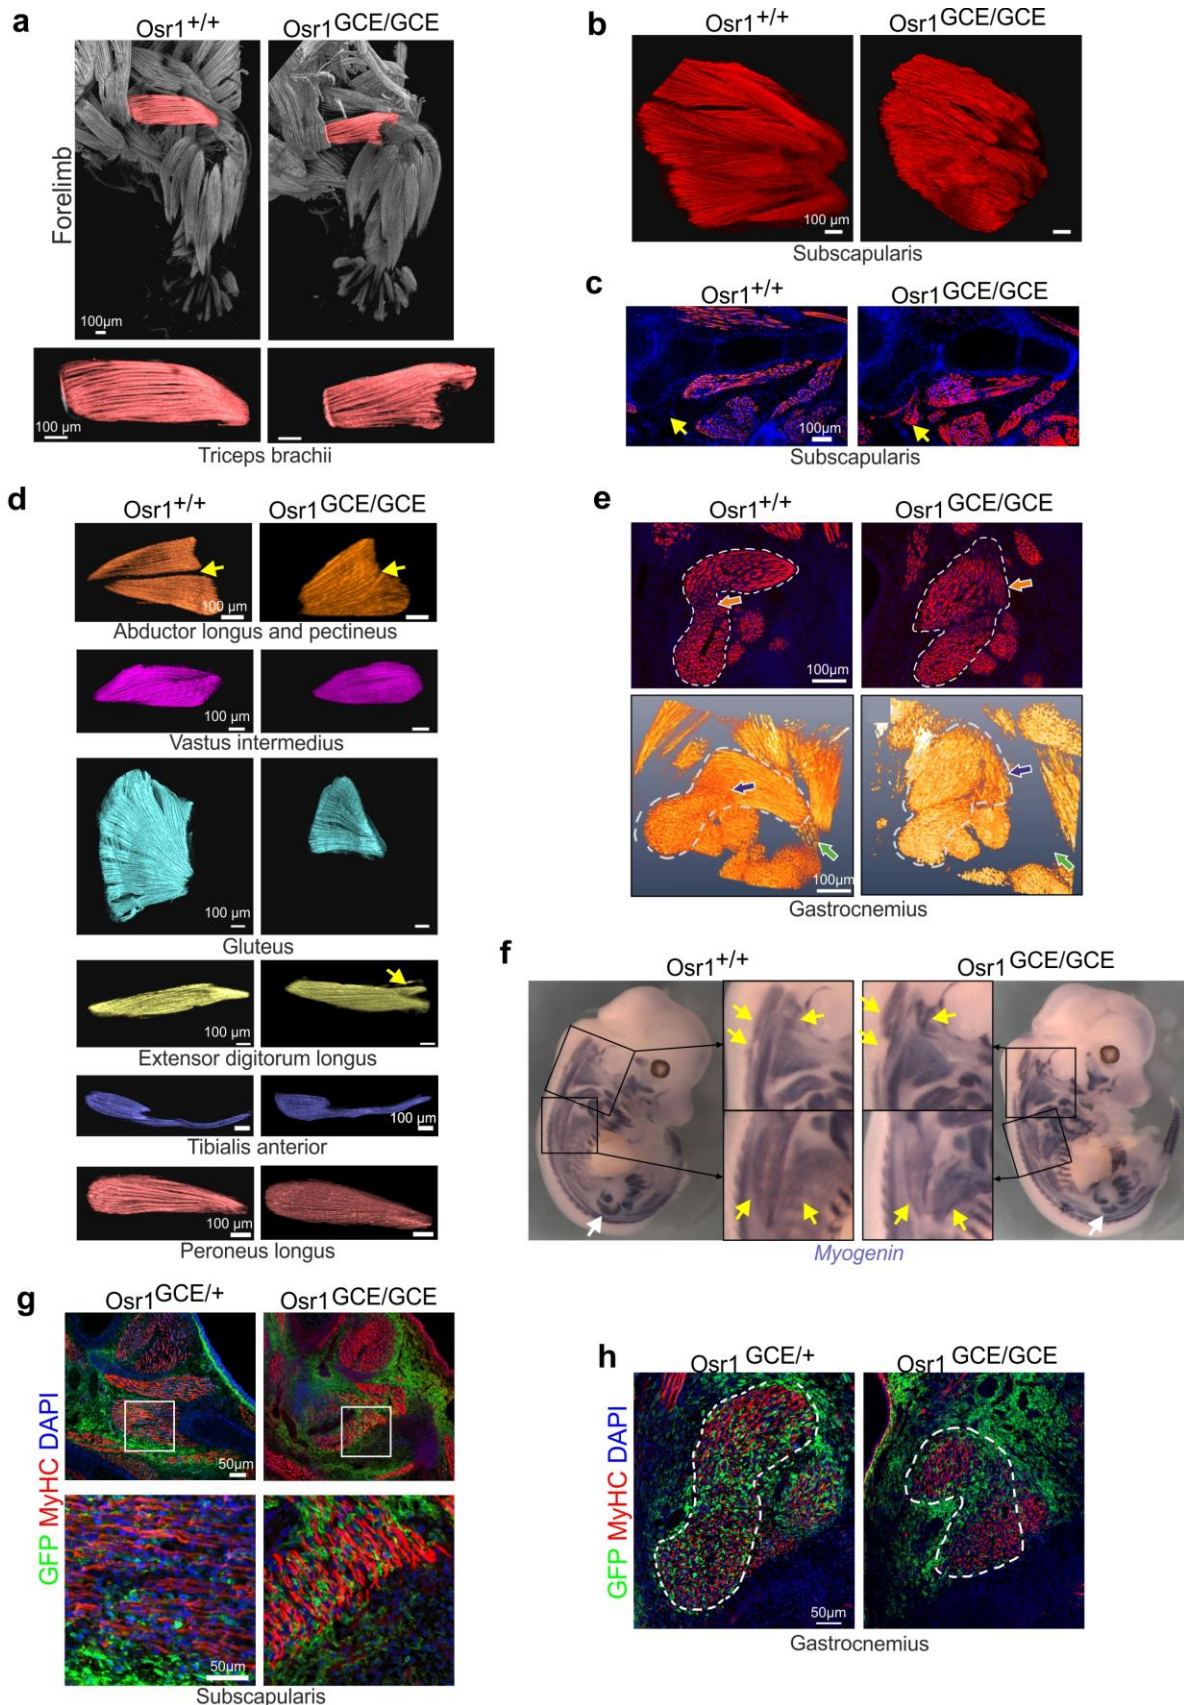

**Supplementary Figure 7. Further examples of muscle patterning defects and presence of *Osr1*<sup>+</sup> cells in *Osr1* mutant embryos.** The forelimbs were less affected than the hindlimbs. Altogether similar defects were seen as in the hindlimbs, as (a) distal truncation as in the Triceps brachii, (b) disarrangement of myofibers shown in the subscapularis muscle and (c) appearance of ectopic fibers proximal to the subscapularis (arrows). (d) Further examples of mispatterning in the hindlimb: a defect in splitting of specific muscles like the Abductor longus and Pectineus muscles was observed. The

vastus intermedius muscle and the Gluteus maximus (pelvic girdle) muscle were altered in shape and size. In addition we observed ectopic myofibers at the distal tip of the Extensor digitorum longus (EDL) muscle, which was however overall unaffected, like the tibialis anterior and peroneus longus muscles. **(e)** The Gastrocnemius muscle is shown as 3D reconstruction (Amira) from individual, MyHC immunolabelled sections, alteration of shape and trajectory is visible. **(f)** Whole-mount ISH for Myogenin on E13.5 *Osr1*<sup>+/+</sup> and *Osr1*<sup>GCE/GCE</sup> embryos shows patterning defects of back muscles and shoulder girdle muscles (yellow arrows in magnification inserts) and the pelvic girdle muscles (white arrows). **(g, h)** *Osr1*-expressing cells are present in *Osr1* mutants at E13.5. *Osr1* gene activity traced by GFP expression was analysed in *Osr1*<sup>GCE/+</sup> and *Osr1*<sup>GCE/GCE</sup> embryos in the shoulder region (f) and the Gastrocnemius muscle (g) of the hindlimb. A similar pattern of muscle-associated and interstitial GFP<sup>+</sup> cells was observed in *Osr1*<sup>GCE/+</sup> and *Osr1*<sup>GCE/GCE</sup> embryos.



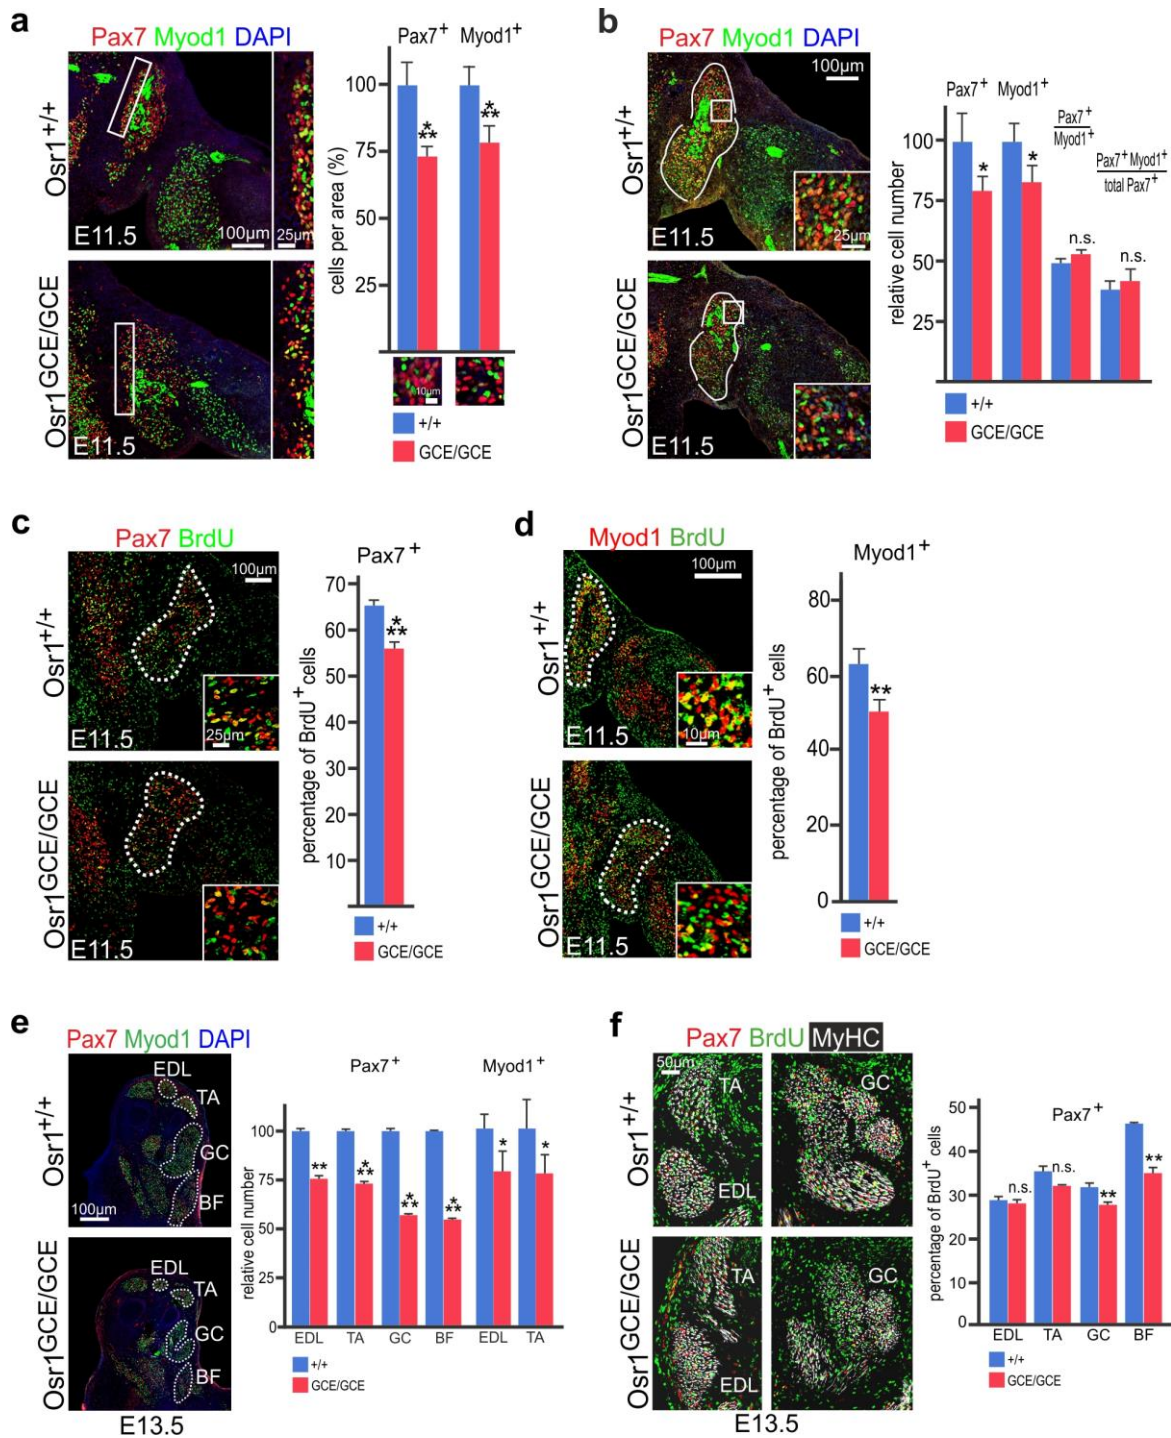

**Supplementary Figure 8. Myogenesis defect in *Osr1*<sup>GCE/GCE</sup> embryonic and persistence of phenotype.**

(a) Immunolabeling for myogenic markers Pax7 and Myod1 on E11.5 limb sections shows proximal limb muscle primordia displaying low density of myogenic cells and fuzzy border of the muscle primordium of *Osr1* mutants (magnification of boxed region). Counting in defined areas within the muscle primordium revealed lower numbers of myogenic cells per area (n=3). (b) Reduced numbers of Pax7<sup>+</sup> and Myod1<sup>+</sup> cells in the proximal muscle primordium of *Osr1* mutants. The ratios of Pax7<sup>+</sup>/Myod1<sup>+</sup> or Pax7<sup>+</sup>Myod1<sup>+</sup>/Pax7<sup>+</sup> cells is unaltered (n=3). (c) Pax7<sup>+</sup> and (d) Myod1<sup>+</sup> cell proliferation was assessed via BrdU labelling (Pax7: wt 65,8±1,0%, mut 56,9±1,1%; Myod1: wt 62,5±4,6%, mut 52,2±3,7%) (n=3). (e) Reduction of myogenic progenitor numbers at E13.5 in indicated muscles. EDL: Extensor digitorum longus; TA: Tibialis anterior; GC: Gastrocnemius; BF: Biceps femoris (n=3). (f) The rate of Pax7<sup>+</sup> progenitor proliferation is still reduced at E13.5 in several muscles of *Osr1*<sup>GCE/GCE</sup> embryos as compared to *Osr1*<sup>+/+</sup> controls (n=3). Error bars represent s.e.m. T-test: \* = p<0.05; \*\* = p<0.01; \*\*\* = p<0.001.

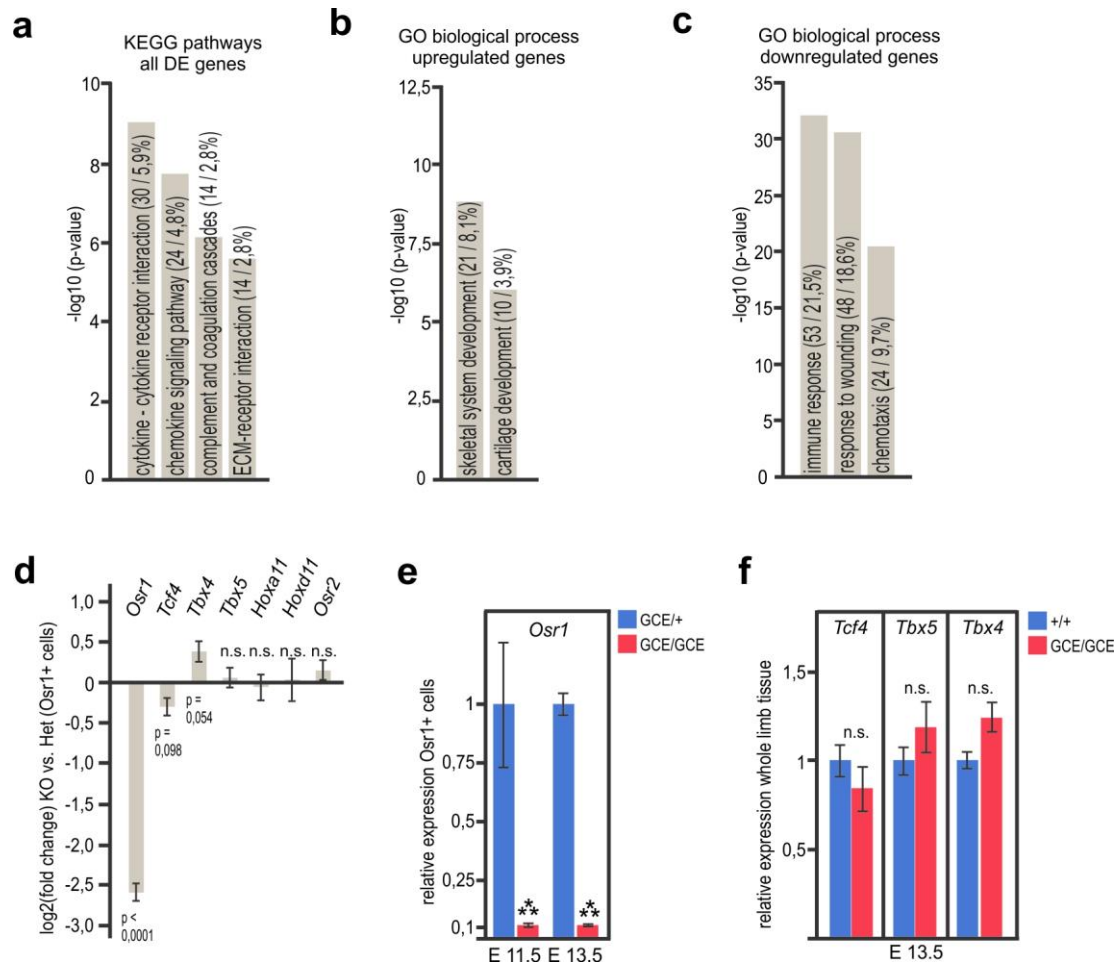

**Supplementary Figure 9. Additional GO and KEGG analyses of *Osr1*<sup>GCE/+</sup> vs. *Osr1*<sup>GCE/GCE</sup> cells.** RNA-Sequencing data and quantification of connective tissue-expressed transcription factors involved in muscle patterning. **(a)** KEGG pathway analysis on all DE genes. **(b, c)** GO analysis for “biological processes” from all upregulated or downregulated genes, respectively. **(d)** Depiction of RNA-Seq data shows no deregulation of *Tbx5*, *Hoxa11*, *Hoxd11* in FACS isolated *Osr1*<sup>+</sup> cells (het vs. KO); *Tcf4* is mildly downregulated (relative expression 0,813, below cut-off) and *Tbx4* shows a significant mild upregulation (relative expression 1,304) in FACS isolated *Osr1*<sup>+</sup> cells (het vs. KO). The *Osr1* paralog *Osr2* was not altered indicating no compensatory upregulation. **(e)** RT-qPCR quantification of *Osr1* expression in FACS isolated *Osr1*<sup>GCE/+</sup> vs. *Osr1*<sup>GCE/GCE</sup> cells (n=4). **(f)** RT-qPCR quantification of *Tcf4*, *Tbx4* and *Tbx5* in whole limb extracts shows no deregulation in *Osr1*<sup>GCE/GCE</sup> limbs as compared to wild type limbs from *Osr1*<sup>+/+</sup> littermates (n=3). Whole limb extracts were chosen over purified *Osr1*<sup>+</sup> cells since *Osr1*<sup>+</sup> cells do not necessarily overlap with limb *Tcf4*<sup>+</sup>, *Tbx4*<sup>+</sup> or *Tbx5*<sup>+</sup> cells. Error bars represent s.e.m. T-test: \*\*\* =  $p < 0,001$ .

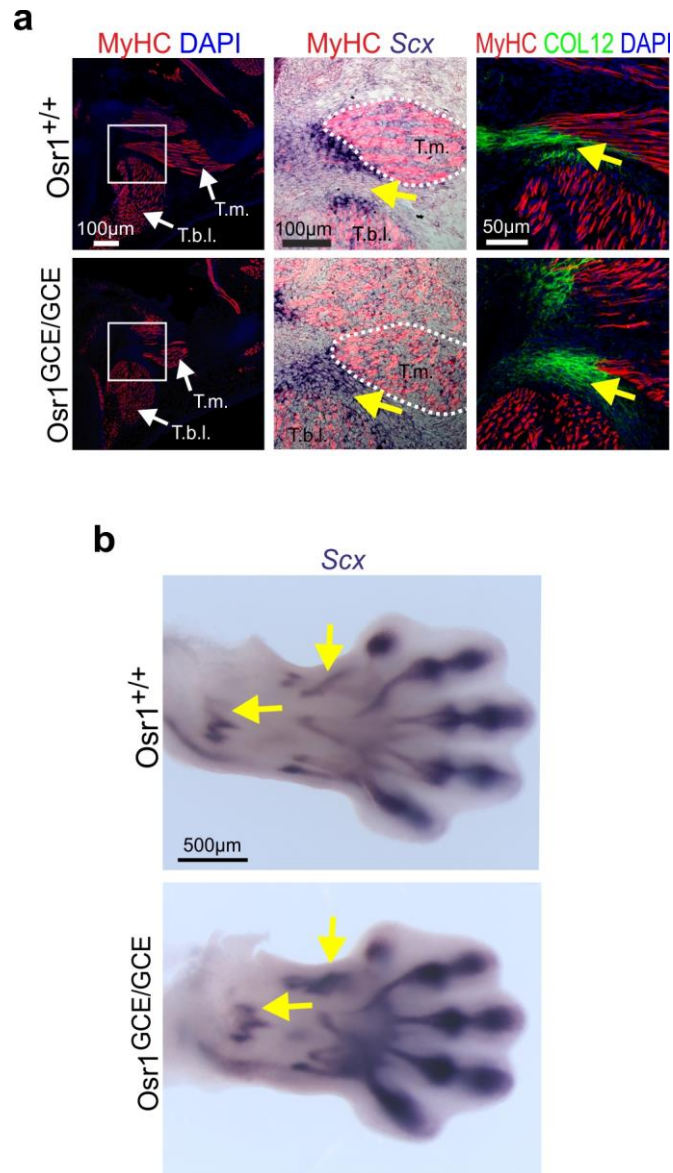

**Supplementary Figure 10. Upregulation and misexpression of Scx.** (a) Section *in situ*-hybridization for *Scx* and immunolabelling for the tendon-specific COL12 on adjacent sections show ectopic tendon cells embedded in a COL12 positive matrix between the Teres major (T.m.) and Triceps brachii lateralis (T.b.l.) muscles in *Osr1* mutants compared to wild-type mice, where the tendons appeared well separated. (b) Whole-mount ISH for *Scx* performed on E13.5 mouse embryos, dorsal sides of forelimbs are shown. Increased signal intensity and expanded expression is visible in *Osr1*<sup>GCE/GCE</sup> forelimbs (arrows).



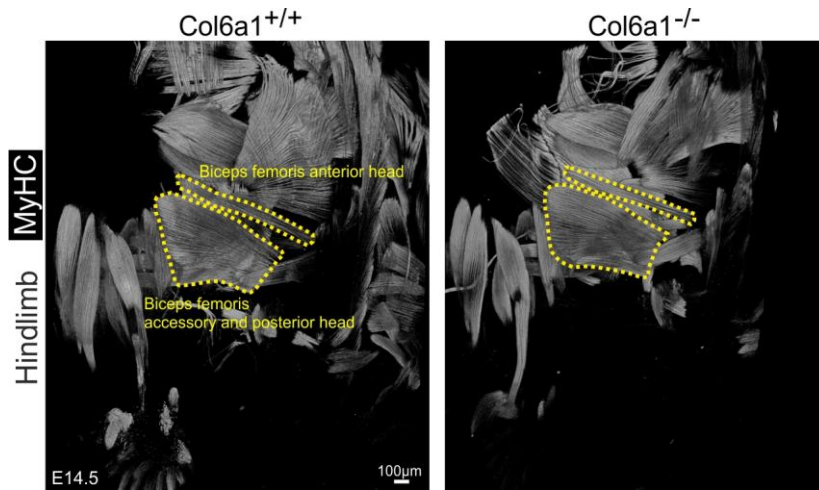

**Supplementary Figure 11. *Col6a1* deficient embryos do not show muscle patterning defects.** Images show 3D reconstructions of Myosin heavy chain (MyHC) immunolabelled E14.5 hindlimbs from *Col6a1*<sup>+/+</sup> and *Col6a1*<sup>-/-</sup> embryos. Dashed lines highlight the Biceps femoris anterior head and the Biceps femoris accessory and posterior head, muscles affected in *Osr1* and *Cxcr4* mutants. No significant changes in size and shape are visible in *Col6a1* mutants.

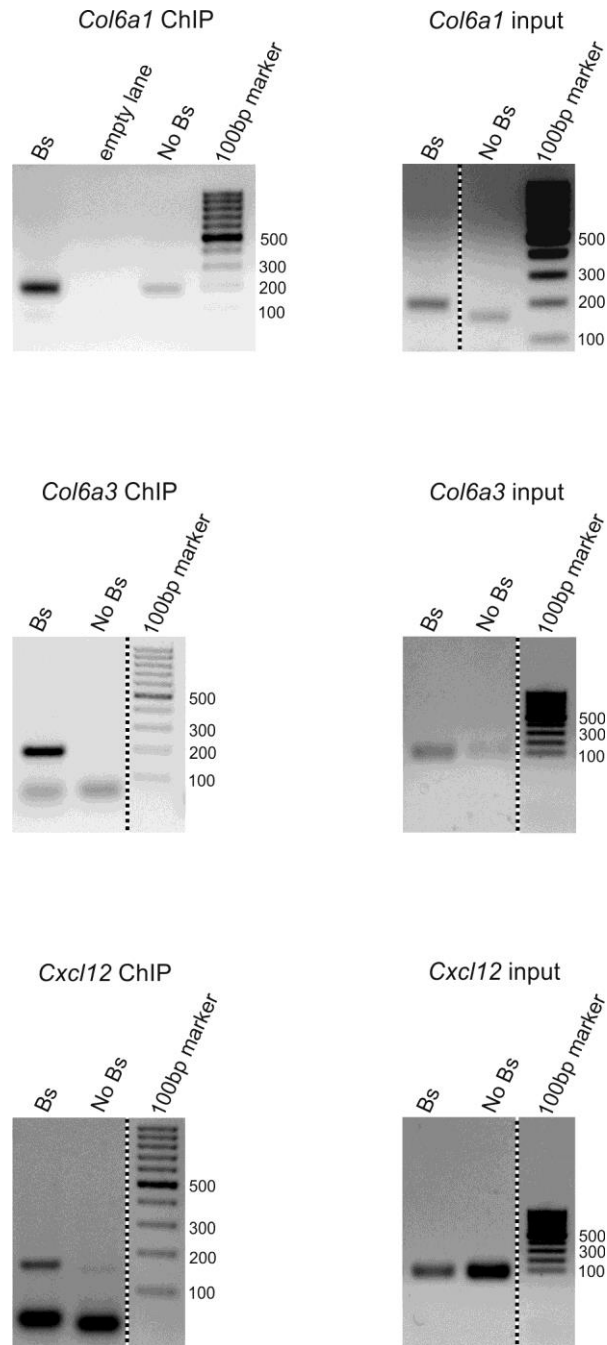

**Supplementary Figure 12. Uncropped Gel electrophoresis lanes from ChIP experiments.** Bs: putative Osr1 binding site; No Bs: control region without Osr1 binding motif. Size marker: 100 base pair ladder; band sizes are indicated in base pairs.

**Supplementary Table 1 Expression levels of ECM genes in *Osr1*<sup>+</sup> cells isolated from E13.5 *Osr1*<sup>GCE/+</sup> embryo limbs**

| Gene           | TPM rank | Mean TPM |
|----------------|----------|----------|
| <i>Col3a1</i>  | 6        | 4304     |
| <i>Col1a2</i>  | 26       | 2607     |
| <i>Col1a1</i>  | 67       | 1864     |
| <i>Sparc</i>   | 86       | 1483     |
| <i>Postn</i>   | 107      | 1227     |
| <i>Mfap2</i>   | 178      | 721      |
| <i>Col6a1</i>  | 180      | 713      |
| <i>Fn1</i>     | 181      | 708      |
| <i>Col6a2</i>  | 188      | 678      |
| <i>Col5a2</i>  | 212      | 580      |
| <i>Mfap4</i>   | 213      | 578      |
| <i>Dcn</i>     | 232      | 550      |
| <i>Lum</i>     | 231      | 548      |
| <i>Col5a1</i>  | 276      | 465      |
| <i>Sulf2</i>   | 349      | 386      |
| <i>Egfl6</i>   | 446      | 322      |
| <i>Mmp14</i>   | 452      | 317      |
| <i>Timp2</i>   | 499      | 289      |
| <i>Col6a3</i>  | 518      | 280      |
| <i>Islr</i>    | 526      | 275      |
| <i>Bgn</i>     | 546      | 268      |
| <i>Tgfbi</i>   | 556      | 264      |
| <i>Lamb1</i>   | 564      | 262      |
| <i>Ogn</i>     | 572      | 260      |
| <i>Loxl2</i>   | 577      | 255      |
| <i>Sepp1</i>   | 623      | 241      |
| <i>Col2a1</i>  | 639      | 236      |
| <i>Fbn2</i>    | 657      | 231      |
| <i>Fbln1</i>   | 709      | 255      |
| <i>Sulf1</i>   | 748      | 208      |
| <i>Nid2</i>    | 814      | 197      |
| <i>Adamts1</i> | 824      | 195      |
| <i>Nid1</i>    | 855      | 188      |
| <i>Eln</i>     | 901      | 181      |
| <i>Lox</i>     | 917      | 178      |
| <i>Col4a1</i>  | 970      | 172      |
| <i>Vcan</i>    | 976      | 170      |
| <i>Emilin1</i> | 1014     | 167      |
| <i>Leprel2</i> | 1166     | 152      |
| <i>Kera</i>    | 1179     | 146      |
| <i>Colec12</i> | 1206     | 144      |
| <i>Mmp11</i>   | 1207     | 144      |
| <i>Net1</i>    | 1240     | 142      |
| <i>Lepre1</i>  | 1248     | 141      |

Shown are the mean transcripts per million (TPM) abundances of the DESeq2 normalized fragment counts and the respective rank for each gene. Genes shown here were selected from the top 10% of genes considered to be expressed (TPM ≥ 2).



**Supplementary Table 2 mRNA abundances of mesenchymal stem cell and FAP surface marker genes in Osr1<sup>+</sup> cells**

| Protein marker / Gene            | TPM rank | Mean TPM |
|----------------------------------|----------|----------|
| CD29 ( <i>Itgb1</i> )            | 306      | 427      |
| PDGFR $\alpha$ ( <i>Pdgfra</i> ) | 401      | 348      |
| CD106 ( <i>Vcam1</i> )           | 1163     | 148      |
| CD146 ( <i>Mcam</i> )            | 2233     | 88       |
| CD166 ( <i>Alcam</i> )           | 2591     | 77       |
| CD34 ( <i>Cd34</i> )             | 3043     | 67       |
| CD90 ( <i>Thy1</i> )             | 4216     | 48       |
| CD73 ( <i>Nt5e</i> )             | 4601     | 43       |
| CD44 ( <i>Cd44</i> )             | 6914     | 25       |
| CD105 ( <i>Eng</i> )             | 8361     | 16       |
| Ly-6A/E / Sca1 ( <i>Ly6a</i> )   | 12531    | 2        |

Shown are the mean transcripts per million (TPM) abundances of the DESeq2 normalised fragment counts and the respective rank for each gene.

**Supplementary table 3 Primary antibodies**

| <b>Antibody</b>          | <b>Clone</b>  | <b>Conjugate</b> | <b>Concentration/<br/>Dilution</b> | <b>Source</b>        |
|--------------------------|---------------|------------------|------------------------------------|----------------------|
| Mouse anti-MyHC          | Monoclonal    | Unconjugated     | 1:500                              | Chemicon             |
| Rabbit anti-GFP          | Polyclonal    | Unconjugated     | 1 µg ml <sup>-1</sup>              | Torrey Pines Biolabs |
| Chicken anti-GFP         | Polyclonal    | Unconjugated     | 10 µg ml <sup>-1</sup>             | Abcam                |
| Goat anti-Desmin         | Polyclonal    | Unconjugated     | 0.2 µg ml <sup>-1</sup>            | R&D Systems          |
| Guinea pig anti-Lbx1     | Polyclonal    | Unconjugated     | 1:20.000                           | C. Birchmeier        |
| Mouse anti-Pax7          | Polyclonal    | Unconjugated     | 1:50                               | DSHB                 |
| Guinea pig anti-Pax7     | Polyclonal    | Unconjugated     | 1:100                              | C. Birchmeier        |
| Goat anti-collagen IV    | Polyclonal    | Unconjugated     | 10 µg ml <sup>-1</sup>             | Chemicon             |
| Rabbit anti-collagen VI  | Polyclonal    | Unconjugated     | 1 µg ml <sup>-1</sup>              | Abcam                |
| Rabbit anti-α-SMA        | Polyclonal    | Unconjugated     | 2 µg ml <sup>-1</sup>              | Abcam                |
| Hamster anti-Pecam1      | Polyclonal    | Unconjugated     | 1:250                              | DSHB                 |
| Rabbit anti-Laminin      | Polyclonal    | Unconjugated     | 5 µg ml <sup>-1</sup>              | Sigma-Aldrich        |
| Rabbit anti-Col12a1      | Polyclonal    | Unconjugated     | 1:500                              | M. Koch              |
| Rabbit anti-Col14a1      | Polyclonal    | Unconjugated     | 1:500                              | M. Koch              |
| Mouse anti-Vinculin      | Monoclonal    | Unconjugated     | 2 µg ml <sup>-1</sup>              | Santa Cruz           |
| Rabbit anti-NCadherin    | Polyclonal    | Unconjugated     | 2 µg ml <sup>-1</sup>              | Santa Cruz           |
| Rabbit anti-TCF4         | Monoclonal    | Unconjugated     | 0.2-2 µg ml <sup>-1</sup>          | Cell Signaling       |
| Goat anti-PDGFRα         | Polyclonal    | Biotinylated     | 4 µg ml <sup>-1</sup>              | R&D Systems          |
| Rabbit anti-MyoD         | Polyclonal    | Unconjugated     | 1:2500                             | C. Birchmeier        |
| Rabbit anti-MyoD         | Polyclonal    | Unconjugated     | 2 µg ml <sup>-1</sup>              | Santa Cruz           |
| Rabbit anti-Vimentin     | Polyclonal    | Unconjugated     | 1:100                              | Sanat Cruz           |
| Guinea pig anti-MyoD     | Polyclonal    | Unconjugated     | 1:2.000                            | C. Birchmeier        |
| Mouse anti-Fibronectin   | Monoclonal    | Unconjugated     | 1:100                              | Sigma-Aldrich        |
| Goat anti-C-Caspase3     | Polyclonal    | Unconjugated     | 1:100                              | Cell Signaling       |
| Sheep anti-BrdU          | Polyclonal    | Unconjugated     | 1:50                               | Abcam                |
| Mouse anti-Ki67          | Monoclonal    | B56              | 1:100                              | BD Biosciences       |
| Rabbit anti-p44/p42 MAPK | Polyclonal    | Unconjugated     | 1:100                              | Cell Signaling       |
| Mouse anti-CyclinD1      | Monoclonal    | Unconjugated     | 1:100                              | Santa Cruz           |
| Rabbit anti-FABP4        | Polyclonal    | Unconjugated     | 1:300                              | Abcam                |
| Goat anti-collagen I     | Polyclonal    | Unconjugated     | 1:100                              | SouthernBiotech      |
| Mouse anti-beta-Gal      | Monoclonal    | Unconjugated     | 1:100                              | DSHB                 |
| Rabbit anti-Myf5         | Polyclonal    | Unconjugated     | 1:100                              | Santa Cruz           |
| Mouse anti-Myogenin      | Monoclonal    | Unconjugated     | 1:200                              | Santa Cruz           |
| Mouse anti FLAG          | Monoclonal M2 | Unconjugated     | 8µg ml <sup>-1</sup>               | Sigma Aldrich        |

#### Supplementary table 4 Secondary antibodies:

| Antibody             | Conjugate(s)                 | Source           |
|----------------------|------------------------------|------------------|
| Donkey anti-mouse    | Alexa Fluor 488, 568 and 680 | Molecular Probes |
| Donkey anti-rabbit   | Alexa Fluor 488, 568 and 680 | Molecular Probes |
| Donkey anti-goat     | Alexa Fluor 488, 568 and 680 | Molecular Probes |
| Goat anti-hamster    | Alexa Fluor 488, 568         | Molecular Probes |
| Goat anti-guinea pig | Alexa Fluor 488, 568         | Molecular Probes |
| Donkey anti-rat      | Alexa Fluor 488, 568         | Molecular Probes |
| Donkey anti-chicken  | Alexa Fluor 488, 568 and 680 | Molecular Probes |
| Donkey anti-sheep    | Alexa Fluor 488              | Molecular Probes |

#### Supplementary table 5 In-situ hybridisation probes

| Gene     | Reference                           |
|----------|-------------------------------------|
| Scx      | Schweitzer et al. 2001 <sup>1</sup> |
| Osr1     | Stricker et al. 2006 <sup>2</sup>   |
| Myod1    | Sassoon et al. 1989 <sup>3</sup>    |
| Myogenin | Sassoon et al. 1989 <sup>3</sup>    |

#### Supplementary table 6 FACS antibodies

| Antibody                     | Clone     | Fluorochrome            | Concentration | Source       |
|------------------------------|-----------|-------------------------|---------------|--------------|
| Hamster anti-CD29            | HMb1-1    | APC                     | 1:100         | eBioscience  |
| Hamster anti-CD34            | HM31      | PerCP-Cy5.5             | 1:100         | BioLegend    |
| Rat anti-CD44                | IM7       | PerCP-Cy5.5             | 1:100         | eBioscience  |
| Rat anti-CD45                | 30-F11    | APC                     | 1:100         | BD Pharmigen |
| Rat anti-CD73                | TY/11.8   | PerCP-e710              | 1:100         | eBioscience  |
| Mouse anti-CD90.1            | HIS51     | PE                      | 1:100         | eBioscience  |
| Rat anti-CD105               | MJ7/18    | APC                     | 1:100         | eBioscience  |
| Rat anti-CD140a              | APA5      | PE                      | 1:100         | eBioscience  |
| Rat anti-CD166               | eBioALC48 | APC                     | 1:100         | eBioscience  |
| Rat anti-T119                | TER-119   | APC                     | 1:100         | BD Pharmigen |
| Rat anti Ly-6A/E             | E13-161.7 | PE/Cy7                  | 1:100         | BioLegend    |
| Anti rat $\alpha$ 7-integrin | R2F2      | PE                      | 1:1000        | AbLab        |
| Anti mouse CD31              | 390       | APC                     | 1:500         | eBioscience  |
| Anti mouse Ly-6A/E (Sca-1)   | D7        | APC/Cy7                 | 1:1000        | BioLegend    |
| Anti mouse CD34              | RAM34     | eFluor <sup>®</sup> 450 | 1:500         | eBioscience  |



**Supplementary table 7 Primer sequences (RT-qPCR):**

| <b>Gene</b>   | <b>Forward</b>            | <b>Reverse</b>             |
|---------------|---------------------------|----------------------------|
| <i>Gadph</i>  | CTGCACCACCAACTGCTTAG      | GGATGCAGGGATGATGTTCT       |
| <i>Col6a1</i> | CGTGGATGCGGTCAAGTA        | CCAGGTGTTTGGCCTCATT        |
| <i>Col6a2</i> | TTCCCTGCCAAACAGAGC        | ATATTGCAACAGAGCCATGC       |
| <i>Col6a3</i> | AGGCCGTA CTCAAGCTTCC      | AGCAAACATGGCAGGTAAGG       |
| <i>Osr1</i>   | GCACACTGATGAGCGACCT       | TGTAGCGTCTTGTGGACAGC       |
| <i>Osr2</i>   | CACACAGACGAGAGGCCATA      | GCAGCTGTAGGGCTTGATGT       |
| <i>Tbx4</i>   | CCAACTCAGAGGGACTCCA       | TCAGCATCTGCTGGTCGTA        |
| <i>Tbx5</i>   | AGCTCTCTCCACCTCATCCA      | CCGAGCGATAGAAGGTGTC        |
| <i>Cxcl12</i> | GCTCCACCCACAAGGTTAAG      | CTGGCAGAAGGCCTGAATA        |
| <i>Col3a1</i> | CTAAAATTCTGCCACCCCGAA     | AGGATCAACCCAGTATTCTCCACTC  |
| <i>Tcf4</i>   | AAGCCTCCAGAGCAGACAAA      | TAAGTGCGGAGGTGGATTTC       |
| <i>Scx</i>    | CCTTCTGCCTCAGCAACCAG      | GGTCCAAAGTGGGGCTCTCCGTGACT |
| <i>Tnmd</i>   | AACACTTCTGGCCCGAGGTAT     | AAGTGTGCTCCATGTCATAGGTTTT  |
| <i>Mkx</i>    | AGTAAAGACAGTCAAGCTGCCACTG | TCCTGGCCACTCTAGAAGCG       |
| <i>Runx2</i>  | GGTCCCCGGGAACCAA          | GGCGATCAGAGAACAACACTAGGTTT |
| <i>Sox5</i>   | GCTCCACCCACAAGGTTAAG      | CTGGCAGAAGGCCTGAATA        |
| <i>Sox9</i>   | GCTCCACCCACAAGGTTAAG      | CTGGCAGAAGGCCTGAATA        |
| <i>Actb</i>   | CTGTATTCCCCTCCATCGTG      | GGAGAGCATAGCCCTCGTAG       |
| <i>Bmp4</i>   | GGATCTTTACCGGCTCCAG       | GCTGCTGAGGTTGAAGAGGA       |
| <i>Col5a3</i> | CCGGAGACTGGATCAGCTT       | GGTCACCCTGTGGAATCCT        |
| <i>Lum</i>    | TGCTCGAGCTTGATCTCTCC      | AAGCGCAGATGCTTGATCTT       |
| <i>Dcn</i>    | ACCCTGACAATCCCCTGATA      | TTCTTGAAGGCCCTTCTTT        |
| <i>Nid2</i>   | GGGCCTTTGCTTTGTACAGT      | TGCACTCGCAGGTGTAGTCT       |

## Supplementary table 8 Primer sequences (ChIP-PCR):

| Gene          |                     | Forward                   | Reverse                |
|---------------|---------------------|---------------------------|------------------------|
| <b>Col6a3</b> | Binding site 1      | TTAGCCCCATGGTTCTTGAC      | TTTTATGGCCTCTGGCAGTC   |
|               | Binding site 2      | ACATCCAAGAGGACAGGTG       | TGATCTCGCTTTCTGCACAT   |
|               | Control (no Bs) 1/2 | AAGCCAAGCAGAGAGCAGAG      | TGGGCTTTCACATCACTTCA   |
| <b>Col6a1</b> | Binding site 1      | TACCAGCTGAGCCATCTCAC      | CGACTCTAGGAGTGCATGCTT  |
|               | Binding site 2      | TGTTAGCCCCATCACTGTCA      | TGTTGGACCCATGCAGACTA   |
|               | Control (no Bs) 1/2 | TCCACCTTTGTTTCTTTGTGG     | GGAAACAGGAGGAGATTGAGG  |
| <b>Lum</b>    | Binding site 1      | AGGGGCTTCCAAGCTAAAAG      | GGAGGTTGCAAGTTTAAACCAA |
|               | Binding site 2      | TACCAGCCTTTAGGGCTTTG      | TCTCAACAAGCATGCAATCA   |
|               | Control (no Bs) 1/2 | TTAGGGACTTGGGGGAGAGT      | GCCCGCTTGTATTTGTGATT   |
| <b>Cxcl12</b> | Binding site 1      | AAGCAATACTTTGGTCAAAGAGAAA | CCAGCCCAGAATTCTTCATT   |
|               | Control (no Bs) 1   | GGAGGCACTGTGGTATTTGG      | GGCCCAAAGGAGTAAATCAA   |
|               | Binding site 2      | CAGCAATAGGAACAACAATAACAA  | TGGTCTCCTTCCATTGGTTT   |
|               | Binding site 3      | CACCAACGCATGCTGTAAGA      | AAACCCTCTGTGGCTGTGAG   |
|               | Control (no Bs) 2/3 | CACATTGCAGTGGATTTGG       | CTTTCATGTGACTGCTGGA    |

Blue: Putative Osr1 binding sites that were positive in ChIP, and respective control sites without binding motif.

## Supplementary References

1. Schweitzer R, *et al.* Analysis of the tendon cell fate using Scleraxis, a specific marker for tendons and ligaments. *Development* **128**, 3855-3866 (2001).
2. Stricker S, Brieske N, Haupt J, Mundlos S. Comparative expression pattern of Odd-skipped related genes Osr1 and Osr2 in chick embryonic development. *Gene Expr Patterns* **6**, 826-834 (2006).
3. Sassoon D, *et al.* Expression of two myogenic regulatory factors myogenin and MyoD1 during mouse embryogenesis. *Nature* **341**, 303-307 (1989).
